# Supplementary material for: Transformation of hollow ZnFe-ZIF-8 nanocrystals into hollow ZnFe–N/C electrocatalysts for the oxygen reduction reaction
Source: Royal Society of Chemistry journal article supplement (doi:10.1039/d0nj04101g), 2020-01-01
Supplement: d0nj04101g1.pdf [file d0nj04101g1.pdf]

## Supporting Information

### **Transformation of hollow ZnFe-ZIF-8 nanocrystals into hollow ZnFe-N/C electrocatalyst for oxygen reduction reaction**

Pengyao Yu<sup>a</sup>, Sheng Liu<sup>d</sup>, Yuchen Cui<sup>a</sup>, Kun Sun<sup>a</sup>, Ling Zhang<sup>a</sup>, Hailing Guo<sup>\*a</sup>, Yongming Chai<sup>a</sup>,  
Chenguang Liu<sup>a</sup>, Lili Fan<sup>c</sup>, Ge Yang<sup>a</sup>, Chunzheng Wang<sup>a</sup>, Svetlana Mintova<sup>a,b</sup>

<sup>a</sup> State Key Laboratory of Heavy Oil Processing, Key Laboratory of Catalysis, China National Petroleum Corp. (CNPC) China University of Petroleum (East China), Qingdao 266555, People's Republic of China.

<sup>b</sup> Normandie Université, Laboratoire Catalyse et Spectrochimie (LCS), ENSICAEN, CNRS, 6 boulevard du Marechal Juin, 14050 Caen, France

<sup>c</sup> School of Materials Science and Engineering, College of Science, China University of Petroleum (East China), Qingdao 266580, China

<sup>d</sup> WISDRI Engineering and Technology Co. Ltd, Wuhan 430000, China

\* Corresponding author: Prof. Hailing Guo, Fax: +86 0532 86981787, Tel: +86 0532 86984688

and e-mail: [guohl@upc.edu.cn](mailto:guohl@upc.edu.cn)

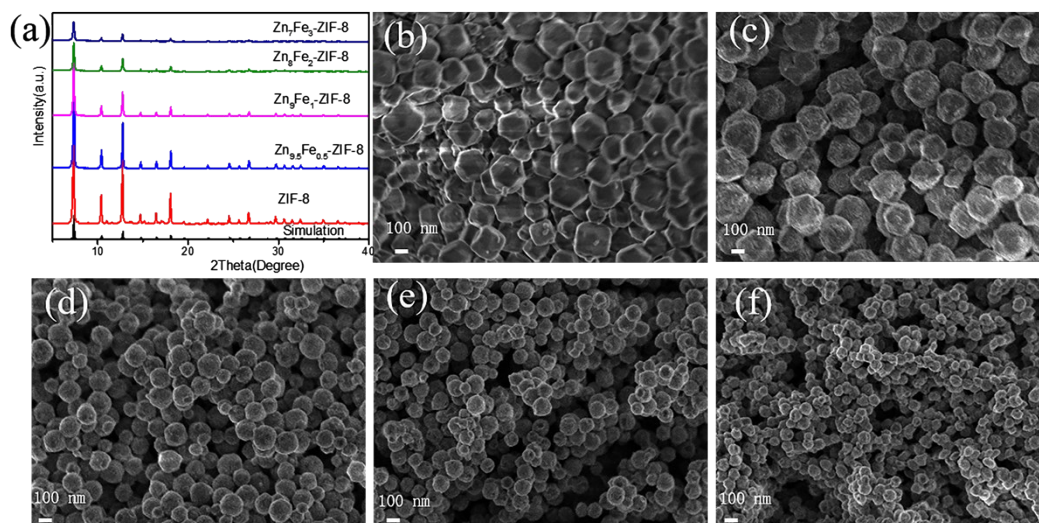

**Figure S1.** XRD patterns of (a) ZIF-8, ZnFe-ZIF-8-1, ZnFe-ZIF-8-2, ZnFe-ZIF-8-3 and ZnFe-ZIF-8-4 samples; SEM images of (b) ZIF-8, (c) ZnFe-ZIF-8-1, (d) ZnFe-ZIF-8-2, (e) ZnFe-ZIF-8-3, and (f) ZnFe-ZIF-8-4 samples.

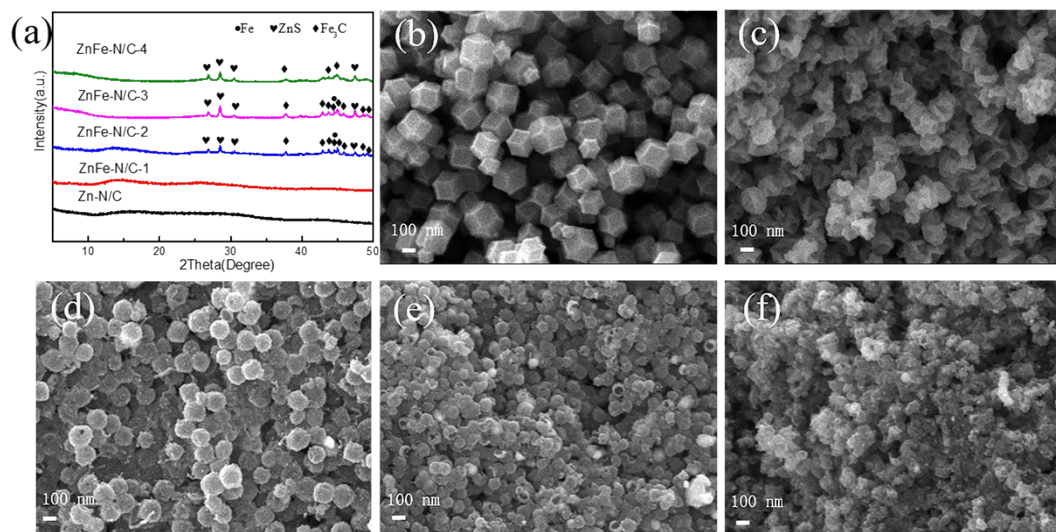

**Figure S2.** XRD patterns of (a) Zn-N/C, ZnFe-N/C-1, ZnFe-N/C-2, ZnFe-N/C-3 and ZnFe-N/C-4 samples; SEM iamges of (b) Zn-N/C, (c) ZnFe-N/C-1, (d) ZnFe-N/C-2, (e) ZnFe-N/C-3, and (f) ZnFe-N/C-4 samples.

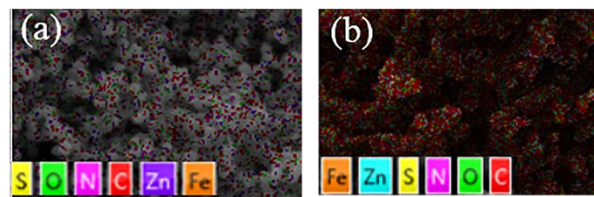

**Figure S3.** EDS mapping of (a) ZnFe-ZIF-8-3 and (b) ZnFe-N/C-3 samples.

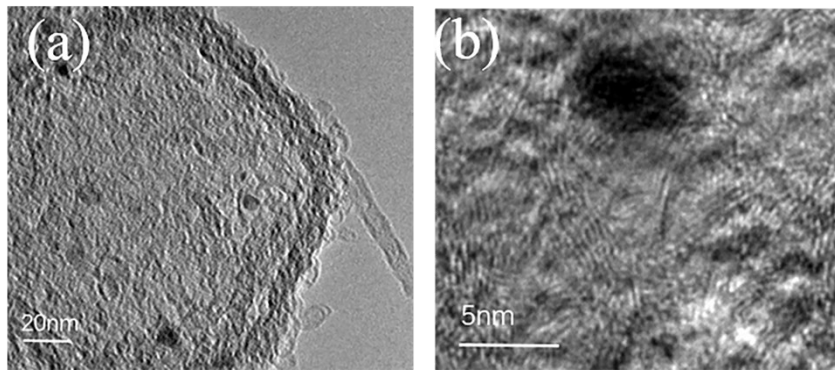

**Figure S4.** TEM images of H<sub>2</sub>SO<sub>4</sub>-leached-ZnFe-N/C-3 samples under different resolutions.

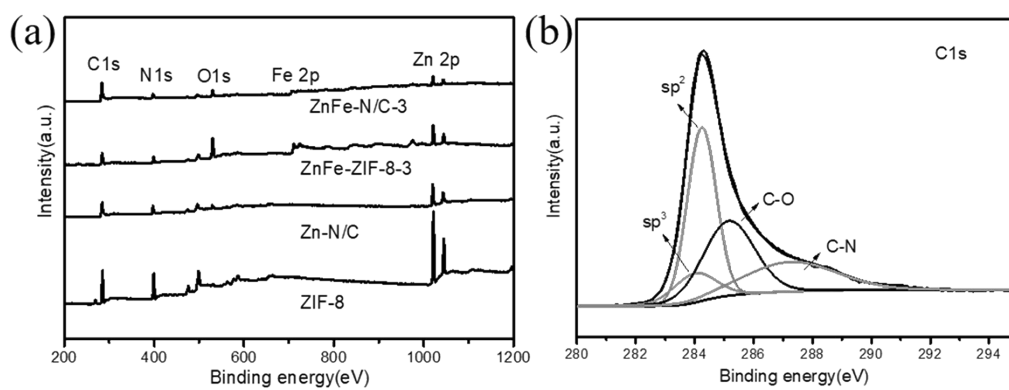

**Figure S5.** (a) Full XPS spectra of ZIF-8, Zn-N/C, ZnFe-ZIF-8-3 and ZnFe-N/C-3 samples; (b) C 1s XPS spectrum of ZnFe-N/C-3.

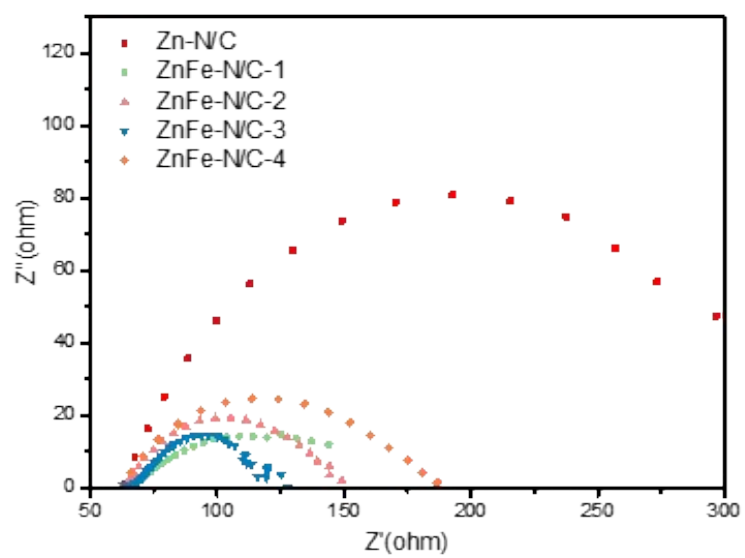

**Figure S6.** Nyquist plots of Zn-N/C, ZnFe-N/C-1, ZnFe-N/C-2, ZnFe-N/C-3, ZnFe-N/C-4.

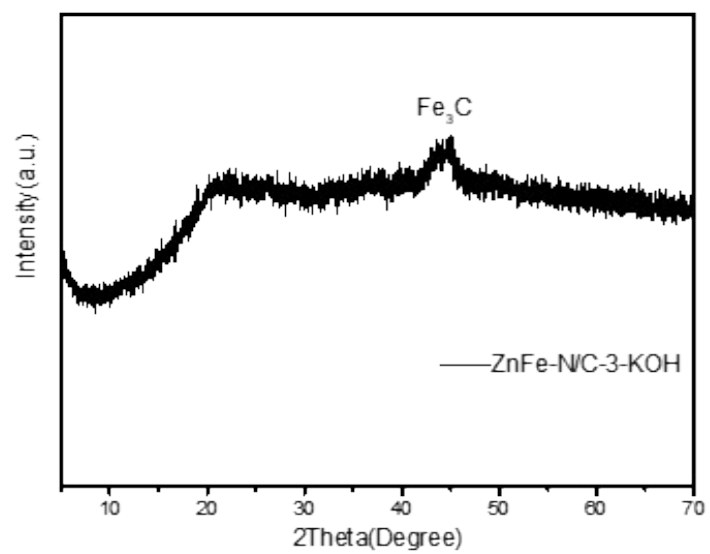

**Figure S7.** XRD pattern of ZnFe-N/C-3-KOH sample.



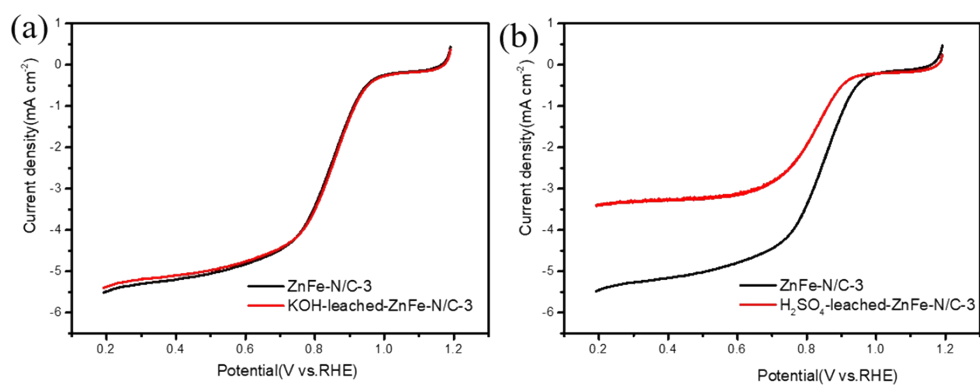

**Figure S8.** ORR polarization curves of as-prepared and KOH-leached (a), H<sub>2</sub>SO<sub>4</sub>-leached (b) ZnFe-N/C-3 measured in 0.1M KOH.

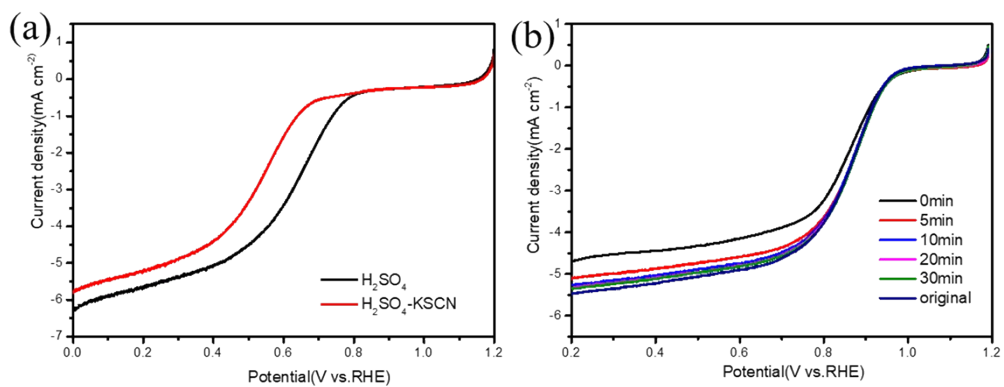

**Figure S9.** (a) ORR polarization curves of ZnFe-N/C-3 catalyst in  $\text{O}_2$ -saturated 0.5M  $\text{H}_2\text{SO}_4$  with or without 0.01M KSCN. (b) Time-dependent ORR polarization curves of  $\text{SCN}^-$  poisoned ZnFe-N/C-3 measured in 0.1M KOH.

**Table S1.** Elemental analysis (wt%) dates of ZnFe-ZIF-8-3 and ZnFe-N/C-3 obtained from ICP.

| Element | ICP(wt %)    |            |
|---------|--------------|------------|
|         | ZnFe-ZIF-8-3 | ZnFe-N/C-3 |
| Fe      | 2.6          | 19.2       |
| Zn      | 12.6         | 6.4        |

**Table S2.** Properties of samples obtained from N<sub>2</sub> sorption measurements.

| Sample       | S <sub>BET</sub> (m <sup>2</sup> /g) | S <sub>micro</sub> (m <sup>2</sup> /g) | S <sub>external</sub> (m <sup>2</sup> /g) | Volume(cm <sup>3</sup> /g) |
|--------------|--------------------------------------|----------------------------------------|-------------------------------------------|----------------------------|
| ZIF-8        | 2036                                 | 1987                                   | 48                                        | 0.9                        |
| ZnFe-ZIF-8-3 | 853                                  | 784                                    | 68                                        | 0.6                        |
| Zn-N/C       | 52                                   | 0                                      | 52                                        | 0.16                       |
| ZnFe-N/C-3   | 176                                  | 0.87                                   | 175                                       | 1                          |
